# Supplementary material
Source: ML conference proceedings conference paper supplement (https://proceedings.neurips.cc/paper_files/paper/2017/hash/d38901788c533e8286cb6400b40b386d-Abstract.html)
Supplement: Supplementary file [file d38901788c533e8286cb6400b40b386d-Supplemental.zip]

## 6 Appendix

### 6.1 Prime optimization problem

In the following, we will derive a constrained optimization problem whose solution minimizes the Bethe free energy (Eq. (13)) under moment matching constraint and additional regularization constraint. The Bethe free energy is convex over  $\hat{p}_t$  and concave over  $q_t$ . Hence it could have multiple minima in the domain of  $\hat{p}_t$  and  $q_t$ . To address this issue, we first introduce the Legendre-Fenchel dual (also called convex conjugate) of  $-\int dx_t q_t(x_t) \log q_t(x_t)$  and reformulate the objective function.

We start from minimizing the Bethe free energy  $F_{\text{Bethe}}$  subject to the expectation propagation constraints.

minimize over  $\hat{p}_t(x_{t-1,t}), q_t(x_t)$  :

$$F_{\text{Bethe}} = \sum_t \int dx_{t-1,t} \hat{p}_t(x_{t-1,t}) \log \frac{\hat{p}_t(x_{t-1,t})}{P(x_t, y_t | x_{t-1})} - \sum_t \int dx_t q_t(x_t) \log q_t(x_t) \quad (10)$$

subject to :

$$\begin{aligned} \langle f(x_t) \rangle_{\hat{p}_t(x_{t-1,t})} &= \langle f(x_t) \rangle_{q_t(x_t)} = \langle f(x_t) \rangle_{\hat{p}_{t+1}(x_t, t+1)}, \\ \int dx_t q_t(x) &= 1 = \int dx_{t-1,t} \hat{p}_t(x_{t-1,t}). \end{aligned}$$

Formally, the convex conjugate of a function  $f(x)$  is defined as  $f^*(y) = \max_x \{y^T x - f(x)\}$ , where the domain of  $y$  is restricted so that the maximum value is finite. This is also known as the Legendre-Fenchel transformation. For each valid distribution  $q_t(x_t)$  in the exponential family, the entropy function  $-\int dx_t q_t(x_t) \log q_t(x_t)$  can be interpreted as the conjugate function of the log partition:

$$-\int dx_t q_t(x_t) \log q_t(x_t) = \min_{\gamma_t} \left\{ -\gamma_t^\top \cdot \langle f(x_t) \rangle_{q_t} + \log \int dx_t \exp(\gamma_t^\top \cdot f(x_t)) \right\} \quad (11)$$

The form can be also verified by checking the derivatives over  $\gamma_t$ . We in essence exploit the Legendre-Fenchel duality between the log partition and the entropy.

We thereafter arrive at

minimize over  $\hat{p}_t, q_t, \gamma_t$  for all  $t$  :

$$F_{\text{Bethe}'} = \sum_t \int dx_{t-1,t} \hat{p}_t(x_{t-1,t}) \log \frac{\hat{p}_t(x_{t-1,t})}{P(x_t, y_t | x_{t-1})} - \sum_t \gamma_t^\top \cdot \langle f(x_t) \rangle_{q_t} + \sum_t \log \int dx_t \exp(\gamma_t^\top \cdot f(x_t)) \quad (12)$$

subject to :

$$\begin{aligned} \langle f(x_t) \rangle_{\hat{p}_t(x_{t-1,t})} &= \langle f(x_t) \rangle_{q_t(x_t)} = \langle f(x_t) \rangle_{\hat{p}_{t+1}(x_t, t+1)}, \\ \int dx_t q_t(x) &= 1 = \int dx_{t-1,t} \hat{p}_t(x_{t-1,t}). \end{aligned}$$

To get rid of the dependence over  $q(x_t)$ , we replace  $\langle f(x_t) \rangle_{q(x_t)}$  in the target with  $\langle f(x_t) \rangle_{\hat{p}_t(x_{t-1,t})}$  by utilizing the constraint  $\langle f(x_t) \rangle_{\hat{p}_t(x_{t-1,t})} = \langle f(x_t) \rangle_{q_t(x_t)}$ . Instead of searching  $\gamma_t$  over the over-complete whole space, we further add a regularization constraint to bound the prime variable  $\gamma_t$  and

will later see how this constraint helps us to build a concave dual function.

minimize over  $\hat{p}_t(x_{t-1,t}), \gamma_t :$

$$F_{\text{Primal}} = \sum_t \int dx_{t-1,t} \hat{p}_t(x_{t-1,t}) \log \frac{\hat{p}_t(x_{t-1,t})}{P(x_t, y_t | x_{t-1})} - \sum_t \gamma_t^\top \cdot \langle f(x_t) \rangle_{\hat{p}_t} + \sum_t \log \int dx_t \exp(\gamma_t^\top \cdot f(x_t)) \quad (13)$$

subject to :

$$\begin{aligned} \langle f(x_t) \rangle_{\hat{p}_t(x_{t-1,t})} &= \langle f(x_t) \rangle_{\hat{p}_{t+1}(x_{t,t+1})} \\ \gamma_t^\top \gamma_t &\leq \eta_t \\ \int dx_{t-1,t} \hat{p}_t(x_{t-1,t}) &= 1. \end{aligned} \quad (14)$$

## 6.2 Solving the primal problem with Lagrange duality

We solve this problem with Lagrange duality theorem. First, we define the Lagrangian function  $\mathcal{L}$  by introducing the Lagrange multipliers  $\alpha_t$ ,  $\lambda_t$  and  $\xi_t$  to incorporate those constraints:

$$\begin{aligned} \mathcal{L} = F_{\text{Primal}} &+ \sum_t \alpha_t^\top \left( \langle f(x_t) \rangle_{\hat{p}_t(x_{t-1,t})} - \langle f(x_t) \rangle_{\hat{p}_{t+1}(x_{t,t+1})} \right) + \sum_t \frac{\lambda_t}{2} (\gamma_t^\top \gamma_t - \eta_t) \\ &+ \sum_t \xi_t \left( \int dx_{t-1,t} \hat{p}_t(x_{t-1,t}) - 1 \right) \end{aligned} \quad (15)$$

where the inequality multiplier  $\lambda_t \geq 0$ . The Lagrange duality theorem implies that  $F_{\text{Dual}}(\alpha_t, \lambda_t, \xi_t) = \inf_{\hat{p}_t(x_{t-1,t}), \gamma_t} \mathcal{L}(\hat{p}_t(x_{t-1,t}), \gamma_t, \alpha_t, \lambda_t, \xi_t)$ . To find the infimum of Lagrangian given dual variables, we need first find extreme point of Lagrangian. Set the derivative of  $\mathcal{L}$  over  $\hat{p}_t(x_{t-1,t}), \gamma_t$  to zero, we get

$$\begin{aligned} \frac{\partial \mathcal{L}}{\partial \hat{p}_t(x_{t-1,t})} &= \log \frac{\hat{p}_t(x_{t-1,t})}{P(x_t, y_t | x_{t-1})} + 1 + \gamma_t^\top \cdot f(x_t) - \alpha_{t-1}^\top \cdot f(x_{t-1}) + \alpha_t^\top \cdot f(x_t) + \xi_t \stackrel{\text{set}}{=} 0 \\ \Rightarrow \hat{p}_t(x_{t-1,t}) &= \frac{1}{Z_{t-1,t}} \exp(\alpha_{t-1}^\top \cdot f(x_{t-1})) P(x_t, y_t | x_{t-1}) \exp((\gamma_t^\top - \alpha_t^\top) \cdot f(x_t)) \end{aligned} \quad (16)$$

$$\text{where } Z_{t-1,t} = \exp(\xi_t + 1) = \int dx_{t-1,t} \exp(\alpha_{t-1}^\top \cdot f(x_{t-1})) P(x_t, y_t | x_{t-1}) \exp((\gamma_t^\top - \alpha_t^\top) \cdot f(x_t))$$

$$\frac{\partial \mathcal{L}}{\partial \gamma_t} = -\langle f(x_t) \rangle_{\hat{p}_t} + \langle f(x_t) \rangle_{\gamma_t} + \lambda_t \gamma_t = 0 \quad (17)$$

$$\text{where } \langle f(x_t) \rangle_{\gamma_t} = \frac{\int dx_t f(x_t) \exp(\gamma_t^\top f(x_t))}{\int dx_t \exp(\gamma_t^\top f(x_t))}$$

Our notation with  $\gamma_t$  as subscript means the statistics over the exponential family distribution parameterized by  $\gamma_t$ . Substituting Eq. (16) into our Lagrangian function (Eq. (15)), we get the following dual form, which is concave over  $\alpha_t, \lambda_t$  for all  $t$ . This is an concave maximization problem whose solution is the global maximum.

maximize over  $\alpha_t, \lambda_t$  for all  $t$  :

$$F_{\text{Dual}} = - \sum_t \log Z_{t-1,t} + \sum_t \log \int dx_t \exp(\gamma_t^\top f(x_t)) + \sum_t \frac{\lambda_t}{2} (\gamma_t^\top \gamma_t - \eta_t) \quad (18)$$

subject to :  $\lambda_t \geq 0$

$$\text{where } Z_{t-1,t} = \int dx_{t-1,t} \exp(\alpha_{t-1}^\top \cdot f(x_{t-1})) P(x_t, y_t | x_{t-1}) \exp((\gamma_t^\top - \alpha_t^\top) \cdot f(x_t)) \quad (19)$$

$$- \langle f(x_t) \rangle_{\hat{p}_t} + \langle f(x_t) \rangle_{\gamma_t} + \lambda_t \gamma_t = 0 \quad (20)$$

$$\hat{p}_t(x_{t-1,t}) = \frac{1}{Z_{t-1,t}} \exp(\alpha_{t-1}^\top \cdot f(x_{t-1})) P(x_t, y_t | x_{t-1}) \exp((\gamma_t^\top - \alpha_t^\top) \cdot f(x_t)) \quad (21)$$

In the dual problem, we have dropped the dual variable  $\xi_t$  since it takes value to normalize  $\hat{p}_t(x_{t-1,t})$  as a valid primal probability. For any dual variable  $\alpha_t, \lambda_t$ , we have mapped primal variables  $\hat{p}_t(x_{t-1,t})$  and  $\gamma_t$  as implicit functions defined by the extreme point conditions Eq. (16),(17). We have the following theoretic guarantee.

**Proposition 1: The Lagrangian function has positive definite Hessian matrix when**  
 $\text{cov}_{\gamma_t}(f(x_t), f(x_t)) + \lambda_t I - \langle f(x_t) \cdot f(x_t)^\top \rangle_{\hat{p}_t(x_{t-1,t})} \succ 0$ .

**Proof :** The hessian matrix is defined as a square matrix of second-order partial derivatives over variables. Since the variables are all indexed by time  $t$  and there is no correlation term between two variables indexed with  $t$  and  $t'$ . It's suffice to check the positive definiteness of Hessian over one time slice, i.e. over  $\hat{p}_t(x_{t-1,t}), \gamma_t$ . We can finally claim overall positive definiteness by noticing that a sum of positive semi-definite matrix with non-intersect column vectors  $z$  to make  $z^T M z = 0$  will be a positive definite matrix.

With the form of Lagrangian in Eq. (15), the hessian matrix over  $\hat{p}_t(x_{t-1,t}), \gamma_t$  becomes

$$\mathbf{H} = \begin{bmatrix} \frac{1}{\hat{p}_t(x_{t-1,t})} & -f(x_t) \\ -f(x_t)^\top & \text{cov}_{\gamma_t}(f(x_t), f(x_t)) + \lambda_t I \end{bmatrix}$$

Using Schur complements, we have the equivalence condition of above hessian matrix to be positive definite as:

$$\mathbf{H} \succ 0 \iff \text{cov}_{\gamma_t}(f(x_t), f(x_t)) + \lambda_t I - \langle f(x_t) \cdot f(x_t)^\top \rangle_{\hat{p}_t(x_{t-1,t})} \succ 0$$

Thus the proof is done.  $\square$

The Proposition 1 ensures the dual function as infimum of Lagrangian function given dual variable. Since the dual function is the point wise infimum of a family of affine functions of  $\alpha_t, \lambda_t, \xi_t$ , it is concave. We name  $\text{cov}_{\gamma_t}(f(x_t), f(x_t)) + \lambda_t I - \langle f(x_t) \cdot f(x_t)^\top \rangle_{\hat{p}_t(x_{t-1,t})} \succ 0$  as dual feasible constraint. Instead of a whole space of dual variables  $\alpha_t, \lambda_t$ , now we only consider constrained domain by dual feasible constraint.

**Proposition 2: The implicit function of  $\hat{p}_t(x_{t-1,t})$  and  $\gamma_t$  defined by Eq. (16), (17) has unique solution under dual feasible constraint.**

**Proof :** The extreme point equations define implicit function of  $\hat{p}_t(x_{t-1,t})$  and  $\gamma_t$ . Consider  $-\langle f(x_t) \rangle_{\hat{p}_t} + \langle f(x_t) \rangle_{\gamma_t} + \lambda_t \gamma_t = 0$  and plug in Eq. (16), we have  $\gamma_t$  as root of function  $F(\gamma_t) = -\langle f(x_t) \rangle_{\hat{p}_t} + \langle f(x_t) \rangle_{\gamma_t} + \lambda_t \gamma_t$ . Check the derivative, we have  $\frac{\partial F(\gamma_t)}{\partial \gamma_t} = -\text{Var}_{\hat{p}_t}(f(x_t)) + \text{cov}_{\gamma_t}(f(x_t), f(x_t)) + \lambda_t I$ . The dual feasible constraint is  $\text{cov}_{\gamma_t}(f(x_t), f(x_t)) + \lambda_t I - \langle f(x_t) \cdot f(x_t)^\top \rangle_{\hat{p}_t(x_{t-1,t})} \succ 0$ . Therefore we have  $\text{cov}_{\gamma_t}(f(x_t), f(x_t)) + \lambda_t I \succ \langle f(x_t) \cdot f(x_t)^\top \rangle_{\hat{p}_t(x_{t-1,t})} \succ \text{Var}_{\hat{p}_t}(f(x_t))$  and  $\frac{\partial F(\gamma_t)}{\partial \gamma_t} \succ 0$ .

For monotonic functional  $F(\gamma_t)$ , it has at most one root. Since  $F(\gamma_t)$  could achieve negative/positive infinity when  $\gamma_t$  takes negative/positive infinity, we have the root of  $F(\gamma_t) = 0$  has unique solution.  $\square$

The Lagrange dual problem is a concave maximization problem with bounded domain. Hence it has a unique global optima. A gradient ascent algorithm or a converging fixed point algorithm should converge to the solution. The partial derivatives of the dual function over the dual variables are the following.

$$\begin{aligned}\frac{\partial F_{\text{Dual}}}{\partial \alpha_t} &= -\langle f(x_t) \rangle_{\hat{p}_{t+1}(x_{t,t+1})} + \langle f(x_t) \rangle_{\hat{p}_t(x_{t-1,t})} + \frac{\partial \gamma_t}{\partial \alpha_t} \cdot \left( -\langle f(x_t) \rangle_{\hat{p}_t} + \langle f(x_t) \rangle_{\gamma_t} + \lambda_t \gamma_t \right) \\ &= -\langle f(x_t) \rangle_{\hat{p}_{t+1}(x_{t,t+1})} + \langle f(x_t) \rangle_{\hat{p}_t(x_{t-1,t})} \\ \frac{\partial F_{\text{Dual}}}{\partial \lambda_t} &= \frac{1}{2} (\gamma_t^\top \gamma_t - \eta_t) + \frac{\partial \gamma_t}{\partial \lambda_t} \cdot \left( -\langle f(x_t) \rangle_{\hat{p}_t} + \langle f(x_t) \rangle_{\gamma_t} + \lambda_t \gamma_t \right) \\ &= \frac{1}{2} (\gamma_t^\top \gamma_t - \eta_t)\end{aligned}$$

where  $\hat{p}_t(x_{t-1,t})$  and  $\gamma_t$  are implicit functions defined by the extreme point conditions Eq. (16),(17). Hence we can get a fixed point iteration through the first derivatives over  $\alpha_t$  to zero. Empirically, the fixed point iteration converges even without the dual feasible constraint ( $\lambda_t = 0$ ); Since the dual feasible constraint bound the  $\lambda_t$ , we should not set the derivative over  $\lambda_t$  to zero.

$$\begin{aligned}\frac{\partial F_{\text{Dual}}}{\partial \alpha_t} \stackrel{\text{set}}{=} 0 &\Rightarrow \text{forward: } \alpha_t^{(\text{new})} = \alpha_t^{(\text{old})} + \gamma \left( \langle f(x_t) \rangle_{\hat{p}_t(x_{t-1,t})} \right) - \gamma_t^{(\text{old})} \\ &\quad \text{backward: } \gamma_t^{(\text{new})} = \gamma \left( \langle f(x_t) \rangle_{\hat{p}_{t+1}(x_{t,t+1})} \right)\end{aligned}$$

### 6.3 Inference with SKM

In the SKM, we have the event based kernel as Eq. (3) and the form of  $\hat{p}_t(x_{t-1,t})$  as Eq. 16. We write  $\gamma_t - \alpha_t$  as  $\beta_t$  and make mean field assumption that  $\alpha_{t-1}^\top \cdot f(x_{t-1}) = \sum_m \alpha_{t-1}^{(m)T} \cdot f(x_{t-1}^{(m)})$ ,  $\beta_t^\top \cdot f(x_t) = \sum_m \beta_t^{(m)T} \cdot f(x_t^{(m)})$ , where the parameter  $\alpha_{t-1}^{(m)}$ ,  $\beta_t^{(m)}$ , the statistics  $f(x_{t-1}^{(m)})$ ,  $f(x_t^{(m)})$  only involve one specific species  $m$  and there is no correlation terms. Substitute the  $P(x_t, v_t | x_{t-1})$  explicitly and, i.e., we have

$$\begin{aligned}\hat{p}_t(x_{t-1,t}, v_t) &= \frac{1}{Z_{t-1,t}} \prod_m \alpha_{t-1}^{(m)}(x_{t-1}^{(m)}) \prod_m \beta_t^{(m)}(x_t^{(m)}) \cdot P(y_t | x_t) \cdot I(x_t \in (x_{\min}, x_{\max})) \\ &\cdot \begin{cases} \tau \cdot c_v \prod_{m=1}^M g_v^{(m)}(x_{t-1}^{(m)}) \cdot \prod_{m=1}^M I(x_t^{(m)} - x_{t-1}^{(m)} = \Delta_v^{(m)}) & \text{if } v_t = v \\ (1 - \tau) \sum_v c_v \prod_{m=1}^M g_v^{(m)}(x_{t-1}^{(m)}) \cdot \prod_{m=1}^M I(x_t^{(m)} - x_{t-1}^{(m)} = 0) & \text{if } v_t = \emptyset \end{cases}\end{aligned}\tag{22}$$

To simplify the notation, we abbreviate  $\exp(\alpha_{t-1}^{(m)T} \cdot f(x_{t-1}^{(m)}))$  as  $\alpha_{t-1}^{(m)}(x_{t-1}^{(m)})$  and  $\exp(\beta_t^{(m)T} \cdot f(x_t^{(m)}))$  as  $\beta_t^{(m)}(x_t^{(m)})$ . We can marginalize the joint solution Eq. 22 over  $x_{t-1}^{(m')}, x_t^{(m')}$  for all the other species  $m' \neq m$  and get the marginal distribution for each particular species  $m$ :

For  $v_t = v$ ,

$$\begin{aligned} \hat{p}_t^{(m)}(x_{t-1}^{(m)}, x_t^{(m)}, v_t) &= \frac{1}{Z_{t-1,t}^{(m)}} \alpha_{t-1}^{(m)}(x_{t-1}^{(m)}) P(y_t^{(m)} | x_t^{(m)}) \beta_t^{(m)}(x_t^{(m)}) \cdot I\left(x_t^{(m)} \in (x_{\min}^{(m)}, x_{\max}^{(m)})\right) \\ &\cdot \tau c_v g_v^{(m)}(x_{t-1}^{(m)}) I(x_t^{(m)} - x_{t-1}^{(m)} = \Delta_v^{(m)}) \\ &\cdot \prod_{m' \neq m} \int_{x_t^{(m')} - x_{t-1}^{(m')} = \Delta_v^{(m')}} dx_{t-1,t}^{(m')} \alpha_{t-1}^{(m')}(x_{t-1}^{(m')}) P(y_t^{(m')} | x_t^{(m')}) \beta_t^{(m')}(x_t^{(m')}) g_v^{(m')}(x_{t-1}^{(m')}) I\left(x_t^{(m')} \in (x_{\min}^{(m')}, x_{\max}^{(m')})\right) \end{aligned}$$

For  $v_t = \emptyset$ ,

$$\begin{aligned} \hat{p}_t^{(m)}(x_{t-1}^{(m)}, x_t^{(m)}, v_t) &= \frac{1}{Z_{t-1,t}^{(m)}} \alpha_{t-1}^{(m)}(x_{t-1}^{(m)}) P(y_t^{(m)} | x_t^{(m)}) \beta_t^{(m)}(x_t^{(m)}) \cdot I\left(x_t^{(m)} \in (x_{\min}^{(m)}, x_{\max}^{(m)})\right) \\ &\cdot I(x_t^{(m)} - x_{t-1}^{(m)} = 0) \\ &\cdot \prod_{m' \neq m} \int_{x_t^{(m')} - x_{t-1}^{(m')} = 0} dx_{t-1,t}^{(m')} \alpha_{t-1}^{(m')}(x_{t-1}^{(m')}) P(y_t^{(m')} | x_t^{(m')}) \beta_t^{(m')}(x_t^{(m')}) I\left(x_t^{(m')} \in (x_{\min}^{(m')}, x_{\max}^{(m')})\right) \\ &- \frac{1}{Z_{t-1,t}^{(m)}} \alpha_{t-1}^{(m)}(x_{t-1}^{(m)}) P(y_t^{(m)} | x_t^{(m)}) \beta_t^{(m)}(x_t^{(m)}) \cdot I\left(x_t^{(m)} \in (x_{\min}^{(m)}, x_{\max}^{(m)})\right) \\ &\cdot \tau c_v g_v^{(m)}(x_{t-1}^{(m)}) I(x_t^{(m)} - x_{t-1}^{(m)} = 0) \\ &\cdot \prod_{m' \neq m} \int_{x_t^{(m')} - x_{t-1}^{(m')} = 0} dx_{t-1,t}^{(m')} \alpha_{t-1}^{(m')}(x_{t-1}^{(m')}) P(y_t^{(m')} | x_t^{(m')}) \beta_t^{(m')}(x_t^{(m')}) g_v^{(m')}(x_{t-1}^{(m')}) I\left(x_t^{(m')} \in (x_{\min}^{(m')}, x_{\max}^{(m')})\right) \end{aligned}$$

Extract the term  $\prod_{m' \neq m} \int_{x_t^{(m')} - x_{t-1}^{(m')} = 0} dx_{t-1,t}^{(m')} \alpha_{t-1}^{(m')}(x_{t-1}^{(m')}) P(y_t^{(m')} | x_t^{(m')}) \beta_t^{(m')}(x_t^{(m')}) I\left(x_t^{(m')} \in (x_{\min}^{(m')}, x_{\max}^{(m')})\right)$ , we arrive

at

$$\begin{aligned} \hat{p}_t^{(m)}(x_{t-1}^{(m)}, x_t^{(m)}, v_t) &= \frac{1}{Z_t^{(m)}} \cdot \alpha_{t-1}^{(m)}(x_{t-1}^{(m)}) P(y_t^{(m)} | x_t^{(m)}) \beta_t^{(m)}(x_t^{(m)}) \cdot P(x_t^{(m)}, v_t | x_{t-1}^{(m)}) \\ \text{where } P(x_t^{(m)}, v_t | x_{t-1}^{(m)}) &= I\left(x_t^{(m)} \in (x_{\min}^{(m)}, x_{\max}^{(m)})\right) \cdot \\ &\begin{cases} c_v \tau g_v^{(m)}(x_{t-1}^{(m)}) \prod_{m' \neq m} \tilde{g}_v^{(m')} \cdot I(x_t^{(m)} - x_{t-1}^{(m)} = \Delta_v^{(m)}) & v_t^{(m)} = v \\ \left(1 - \sum_v c_v \tau g_v^{(m)}(x_{t-1}^{(m)}) \prod_{m' \neq m} \tilde{g}_v^{(m')}\right) I(x_t^{(m)} - x_{t-1}^{(m)} = 0) & v_t^{(m)} = \emptyset \end{cases} \\ \tilde{g}_v^{(m')} &= \frac{\int_{x_t^{(m')} - x_{t-1}^{(m')} = \Delta_v^{(m')}} dx_{t-1,t}^{(m')} \alpha_{t-1}^{(m')}(x_{t-1}^{(m')}) P(y_t^{(m')} | x_t^{(m')}) \beta_t^{(m')}(x_t^{(m')}) g_v^{(m')}(x_{t-1}^{(m')}) I\left(x_t^{(m')} \in (x_{\min}^{(m')}, x_{\max}^{(m')})\right)}{\int_{x_t^{(m')} - x_{t-1}^{(m')} = 0} dx_{t-1,t}^{(m')} \alpha_{t-1}^{(m')}(x_{t-1}^{(m')}) P(y_t^{(m')} | x_t^{(m')}) \beta_t^{(m')}(x_t^{(m')}) I\left(x_t^{(m')} \in (x_{\min}^{(m')}, x_{\max}^{(m')})\right)} \\ \hat{g}_v^{(m')} &= \frac{\int_{x_t^{(m')} - x_{t-1}^{(m')} = 0} dx_{t-1,t}^{(m')} \alpha_{t-1}^{(m')}(x_{t-1}^{(m')}) P(y_t^{(m')} | x_t^{(m')}) \beta_t^{(m')}(x_t^{(m')}) g_v^{(m')}(x_{t-1}^{(m')}) I\left(x_t^{(m')} \in (x_{\min}^{(m')}, x_{\max}^{(m')})\right)}{\int_{x_t^{(m')} - x_{t-1}^{(m')} = 0} dx_{t-1,t}^{(m')} \alpha_{t-1}^{(m')}(x_{t-1}^{(m')}) P(y_t^{(m')} | x_t^{(m')}) \beta_t^{(m')}(x_t^{(m')}) I\left(x_t^{(m')} \in (x_{\min}^{(m')}, x_{\max}^{(m')})\right)} \quad (23) \\ Z_t^{(m)} &= \frac{Z_t}{\prod_{m' \neq m} \int_{x_t^{(m')} - x_{t-1}^{(m')} = 0} dx_{t-1,t}^{(m')} \alpha_{t-1}^{(m')}(x_{t-1}^{(m')}) P(y_t^{(m')} | x_t^{(m')}) \beta_t^{(m')}(x_t^{(m')}) I\left(x_t^{(m')} \in (x_{\min}^{(m')}, x_{\max}^{(m')})\right)} \\ &= \int_{x_t^{(m)} = x_{t-1}^{(m)}} dx_{t-1,t}^{(m)} \alpha_{t-1}^{(m)}(x_{t-1}^{(m)}) P(y_t^{(m)} | x_t^{(m)}) \beta_t^{(m)}(x_t^{(m)}) I\left(x_t^{(m)} \in (x_{\min}^{(m)}, x_{\max}^{(m)})\right) \\ &\cdot \left(\sum_v c_v \tau \prod_{all\ m} \tilde{g}_v^{(m)} + 1 - \sum_v c_v \tau \prod_{all\ m} \hat{g}_v^{(m)}\right) \end{aligned}$$

, where  $Z_t^{(m)}$ ,  $Z_t$  are respectively the normalization constant of  $\xi_t^{(m)}(x_{t-1}^{(m)}, x_t^{(m)}, v_t)$  and  $\xi_t(x_{t-1}, x_t, v_t)$ . In Eq. 23,  $\hat{p}_t^{(m)}(x_{t-1}^{(m)}, x_t^{(m)}, v_t)$  takes the same form as the joint solution Eq. 22, except a marginalized transition kernel  $P(x_t^{(m)}, v_t | x_{t-1}^{(m)})$  which sums over all the other species  $m' \neq m$ . Instead of coping with exploding joint state space, we can now cope with each marginalized Markov chain with kernel  $P(x_t^{(m)}, v_t | x_{t-1}^{(m)})$ . Moreover,  $\hat{g}_v^{(m')}$ ,  $\hat{g}_v^{(m')}$  can be interpreted as expectation of  $g$  factor at species  $m'$ . This suggests that each species evolves their states marginally according to the average effects of the others.

To summarize, we give the general algorithms.

---

**Algorithm 2** Fixed Point Algorithm

---

**Input:** The discrete time SKM model (Eq. 1, 2, 3); the observations  $y_t^{(m)}$  for all  $t, m$ ; the observation model  $P(y_t^{(m)} | x_t^{(m)})$ ; any initialization of  $\alpha_t^{(m)}, \beta_t^{(m)}, \lambda_t^{(m)} > 0$

- 1: Define function: **ForwardTransition**( $\alpha_{t-1}^{(m)}, \beta_t^{(m)}$ )  
Find  $\xi_t^{(m)}(x_{t-1,t}^{(m)})$  from Eq. 23; Find  $\gamma_t^{(m)}$  from  $\langle f(x_t^{(m)}) \rangle_{\gamma_t^{(m)}(x_t^{(m)})} = \langle f(x_t^{(m)}) \rangle_{\xi_t^{(m)}(x_{t-1,t}^{(m)})}$ ;  
Update  $\alpha_t^{(m)} \leftarrow \gamma_t^{(m)} - \beta_t^{(m)}$ . **Output**  $\alpha_t^{(m)}, \gamma_t^{(m)}$
- 2: Define function: **BackwardTransition**( $\alpha_{t-1}^{(m)}, \beta_t^{(m)}$ )  
Find  $\xi_t^{(m)}(x_{t-1,t}^{(m)})$  from Eq. 23; Find  $\gamma_{t-1}^{(m)}$  from  $\langle f(x_{t-1}^{(m)}) \rangle_{\gamma_{t-1}^{(m)}(x_{t-1}^{(m)})} = \langle f(x_{t-1}^{(m)}) \rangle_{\xi_t^{(m)}(x_{t-1,t}^{(m)})}$ ;  
Update  $\beta_{t-1}^{(m)} \leftarrow \gamma_{t-1}^{(m)} - \alpha_{t-1}^{(m)}$ . **Output**  $\beta_{t-1}^{(m)}, \gamma_{t-1}^{(m)}$
- 3: **repeat**
- 4:   **for**  $t=2$  to  $T$  **do**
- 5:      $\alpha_t^{(m)}, \gamma_t^{(m)} \leftarrow \text{ForwardTransition}(\alpha_{t-1}^{(m)}, \beta_t^{(m)})$
- 6:   **end for**
- 7:   **for**  $t=T-1$  to  $1$  **do**
- 8:      $\beta_t^{(m)}, \gamma_t^{(m)} \leftarrow \text{BackwardTransition}(\alpha_t^{(m)}, \beta_{t+1}^{(m)})$
- 9:   **end for**
- 10: **until** Convergence of  $\gamma_t^{(m)}$
- 11: **Output**  $\gamma_t^{(m)}$

---



---

**Algorithm 3** Gradient Ascent Algorithm

---

**Input:** The discrete time SKM model (Eq. 1, 2, 3); the observations  $y_t^{(m)}$  for all  $t, m$ ; the observation model  $P(y_t^{(m)} | x_t^{(m)})$ ; any initialization of  $\alpha_t^{(m)}, \beta_t^{(m)}, \gamma_t^{(m)} = \alpha_t^{(m)} + \beta_t^{(m)}$ ; Function **ForwardTransition**, **BackwardTransition** in algorithm 2

- 1: **repeat**
- 2:   **for**  $t=2$  to  $T-1$  **do**
- 3:     **repeat**
- 4:       Update  $\hat{p}_t(x_{t-1,t}) = \frac{1}{Z_{t-1,t}} \exp(\alpha_{t-1}^\top \cdot f(x_{t-1})) P(x_t, y_t | x_{t-1}) \exp((\gamma_t^\top - \alpha_t^\top) \cdot f(x_t))$   
and  $\langle f(x_t) \rangle_{\hat{p}_t}$  according to 7,8,9 under dual feasible constraint
- 5:       **until** Convergence or enough number of iterations
- 6:     **end for**
- 7:     **for**  $t=T-1$  to  $2$  **do**
- 8:       Do the same as line 4 to 6
- 9:     **end for**
- 10: **until** Convergence
- 11: **Output**  $\hat{p}_t(x_{t-1,t}) = \frac{1}{Z_{t-1,t}} \exp(\alpha_{t-1}^\top \cdot f(x_{t-1})) P(x_t, y_t | x_{t-1}) \exp((\gamma_t^\top - \alpha_t^\top) \cdot f(x_t))$  and  $\langle f(x_t) \rangle_{\hat{p}_t}$

---
